# Supplementary material
Source: PubMed Central journal article supplement (PMC5506378)
Supplement: NIHMS870870-supplement-supplement.pdf [file NIHMS870870-supplement-supplement.pdf]

# Supporting Information

## Enhanced Isolation and Release of Circulating Tumor Cells using Nanoparticle Binding and Ligand Exchange in a Microfluidic Chip

Myoung-Hwan Park,<sup>†,‡,||,▼</sup> Eduardo Reátegui,<sup>⊥,‡,Δ,▼</sup> Wei Li,<sup>†,§</sup> Shannon N. Tessier,<sup>⊥,‡,Δ</sup> Keith H. K. Wong,<sup>⊥,‡,Δ</sup> Anne E. Jensen,<sup>⊥</sup> Vishal Thapar,<sup>Δ</sup> David Ting,<sup>Δ</sup> Mehmet Toner,<sup>⊥,‡</sup> Shannon L. Stott,<sup>\*,⊥,Δ,¶</sup> and Paula T. Hammond<sup>\*,†,‡,§</sup>

<sup>†</sup>Department of Chemical Engineering, <sup>‡</sup>Institute for Soldier Nanotechnologies, and <sup>§</sup>David H. Koch Institute for Integrative Cancer Research, Massachusetts Institute of Technology, Cambridge, Massachusetts 02139, United States

<sup>||</sup> Department of Chemistry, Sahmyook University, Seoul, 01795, Korea

<sup>⊥</sup>Center for Engineering in Medicine, <sup>#</sup>Department of Surgery, <sup>Δ</sup>Massachusetts General Hospital Cancer Center and <sup>¶</sup>Department of 10 Medicine, Massachusetts General Hospital, Harvard Medical School, Boston, Massachusetts 02114, United States

## **Synthesis of gold nanoparticles.**

Gold nanoparticles (AuNPs) were prepared by following the Brust-Schiffrin two-phase method, using 1-pentanethiol as the capping ligand. To functionalize the NP surface, 30 mg of 1-pentanethiol protected gold nanoparticles (Au-C5) were mixed with 30 mg of COOH functionalized (MUA) and 90 mg of NHS ester functionalized (12-mercaptododecanoic acid NHS ester) thiol in 20 mL of dichloromethane (DCM). The solution was stirred in the dark for about 24 h, during which time the NPs precipitated out of solution. The precipitate in the reaction mixture was centrifuged and then washed twice with ether and DCM to remove free thiols. The resulting precipitate was dried in a vacuum and stored at 4 °C. Prior to use in the microfluidic device, the NPs were dissolved in methanol.

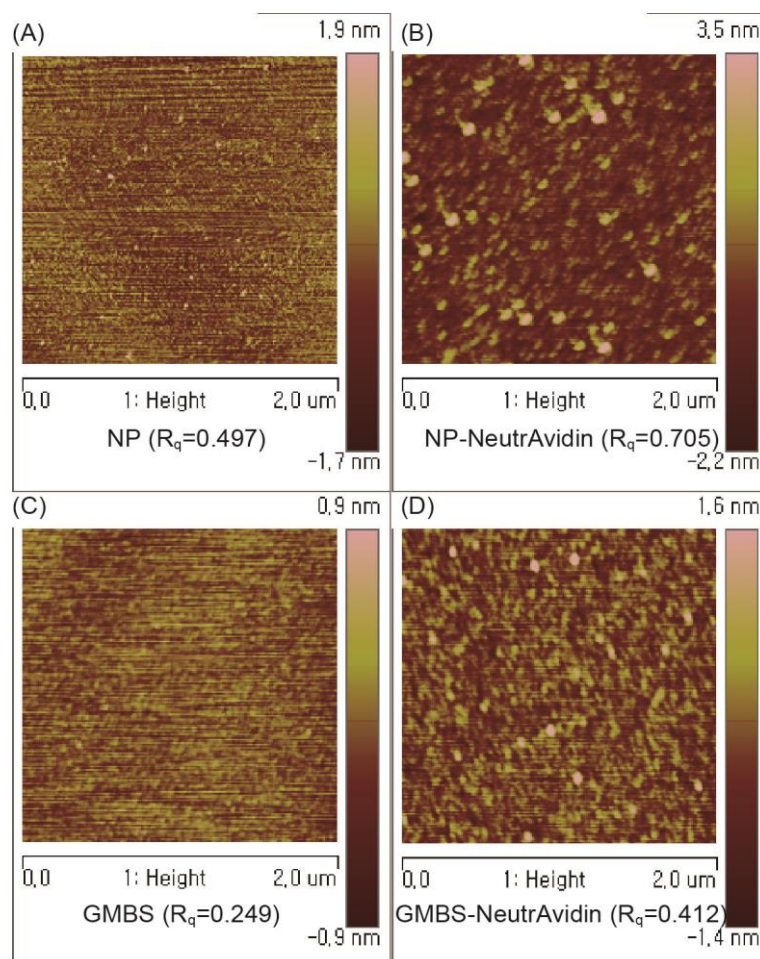

**Figure S1.** The topographic images of the NP-mediated chip substrates exhibit a corrugated surface generated by (a) the NP assemblies and (b) NP-NeutrAvidin binding, with  $R_q$  values of 0.497 nm and 0.705 nm, respectively. This is compared to (c) the GMBS and (d) GMBS-NeutrAvidin binding on smooth substrates with  $R_q$  values of 0.249 nm and 0.412 nm, respectively.

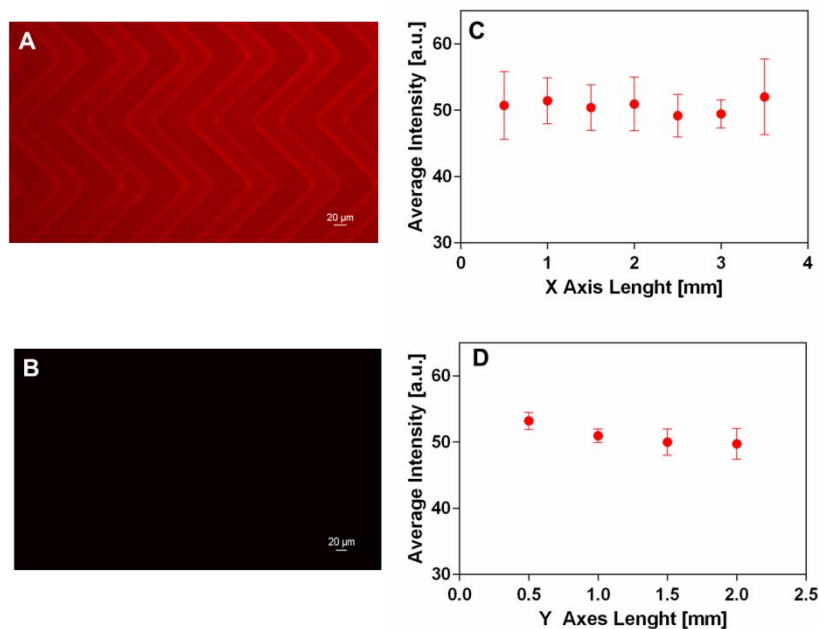

**Figure S2.** Fluorescence microscopy images of (A) a functionalized microfluidic surface with Biotin-RPE and (B) a control surface with a NP surface without neutravidin, demonstrating the deposition of NeutrAvidin on the surface of the microfluidic device. Quantification of the average fluorescence intensity along (C) the X axis and (D) the Y axis of the image shown in the Figure S2A. Five images per point were measured and three different devices were used.

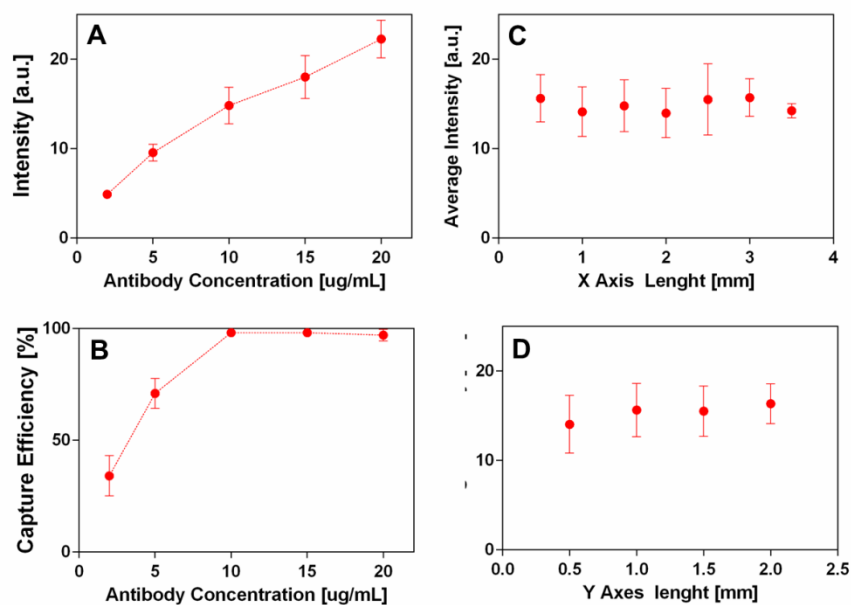

**Figure S3.** (A) Quantification of the amount of antibody on the surface with concentration used for immobilization onto a device and (B) capture efficiency of PC3 cells at different antibody concentrations. Quantification of the average fluorescence intensity along (C) the X axis and (D) the Y axis of the microfluidic device. For C & D a concentration of 10 ug/mL of a primary antibody was used and the secondary antibody was used according specifications of the manufacturer at 5 uL per 100uL of solution. Importantly, the correlated increase was observed in the capture efficiency of PC3 cells with the antibody coverage up to a concentration of 10 ug/mL, but the efficiency ( $98.15 \pm 1.1$  %) was saturated over than the antibody concentration (10 ug/mL) (Figure S3B). These results indicate that our experiments always with a use of an antibody concentration ( $>10$  ug/mL) were performed in the high quality condition.

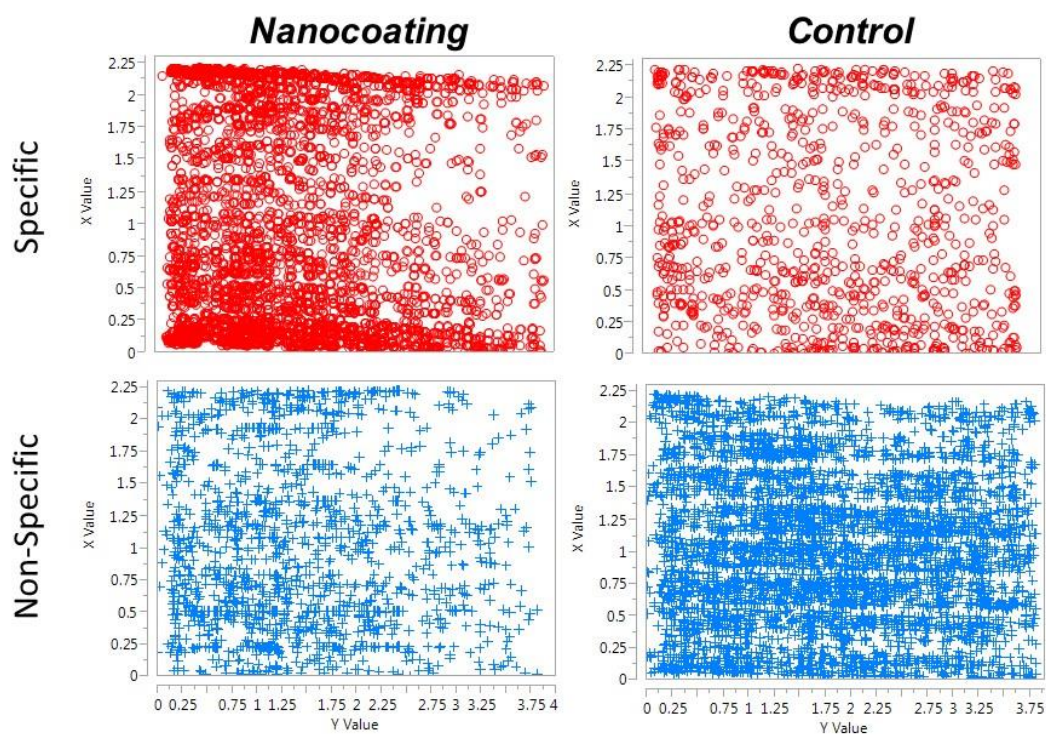

**Figure S4.** Heat map distribution of specific and non-specific cell capture of MDA-MB-231 CTCs on the surface of the microfluidic device.

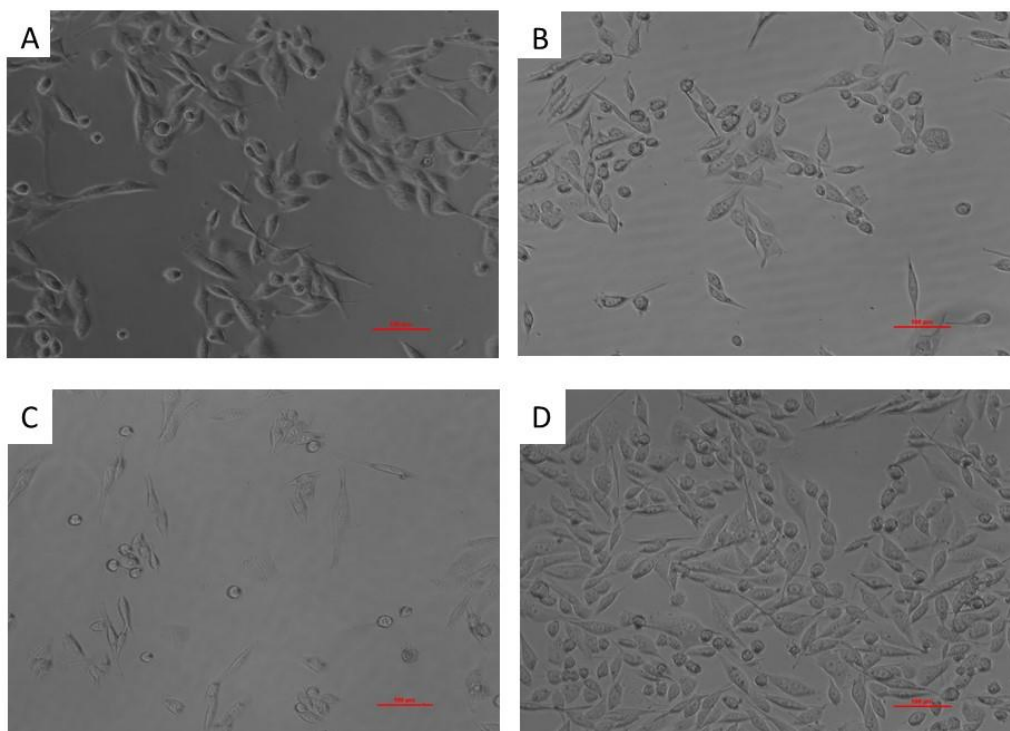

**Figure S5.** Cultured (A) PC3 and (B) MDA-MD-231 cells in the presence of GSH (1 mg/mL) for 4.5 h. Cultured cells (C) 1 day and (D) 5 days after GSH release from the nanocoating surface.

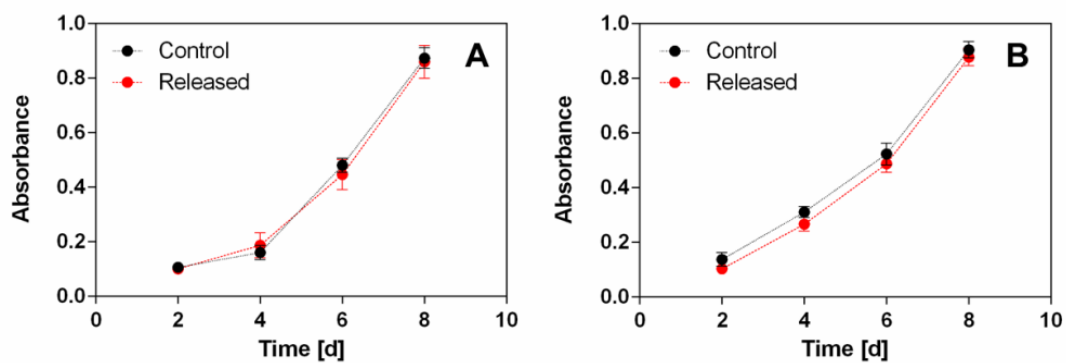

**Figure S6.** MTT assay performed with (A) the released PC3 and (B) the MDA-MB-231 cells by measuring the absorbance at 570 nm. Experiments were performed on triplicates and a control indicates untreated PC3 or MDA-MB-231 cells with our device. During 8 days, any significant difference in proliferation rate was not found for the control and released cells.



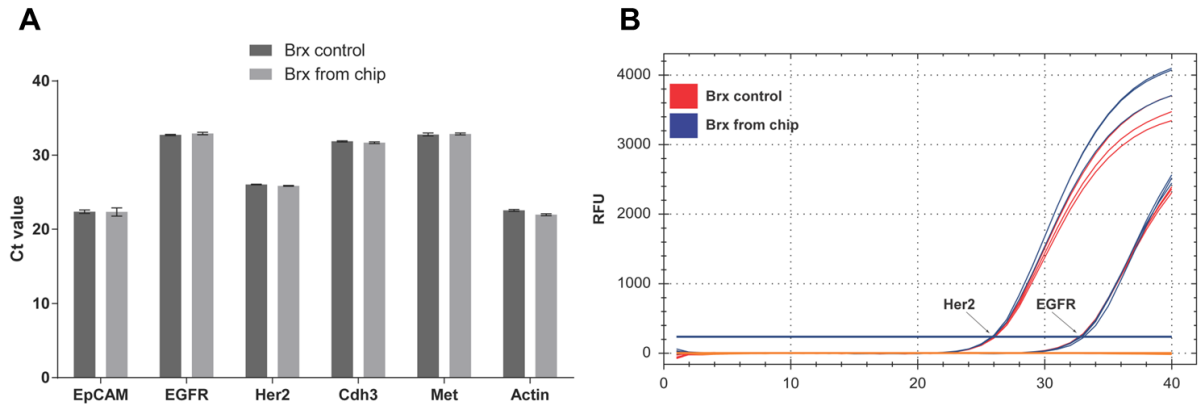

**Figure S7.** (A) Comparison of the Ct values for 6 genes obtained by RT-qPCR for control and released Brx cells. (B) Comparison of the amplification cycles for two of the genes used.

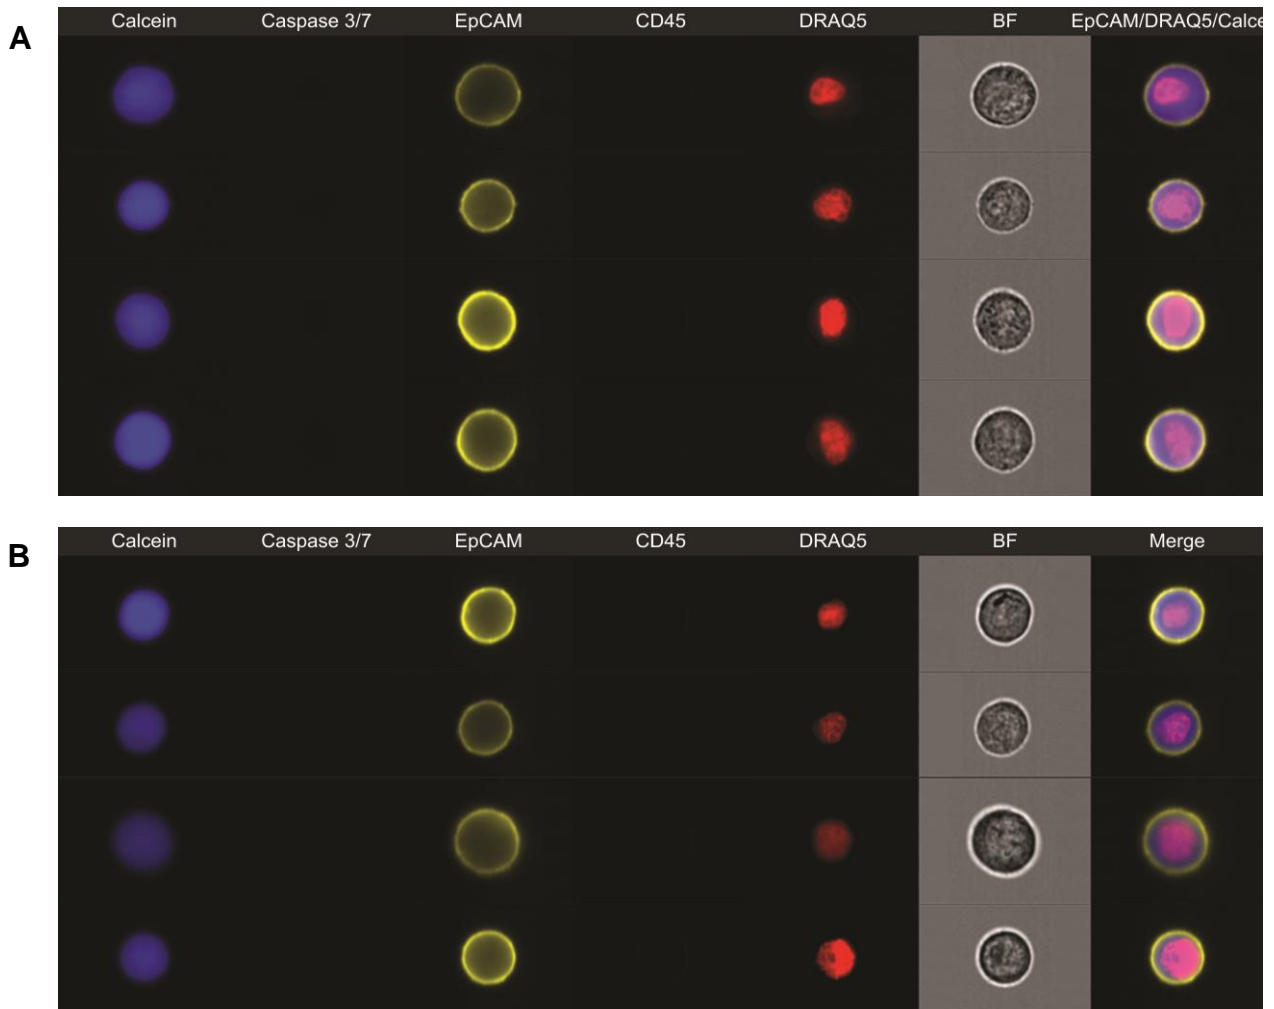

**Figure S8.** Imaging flow cytometry images of the two experimental groups: (A) Control Brx cells, and (B) Brx cells released from the microfluidic device.

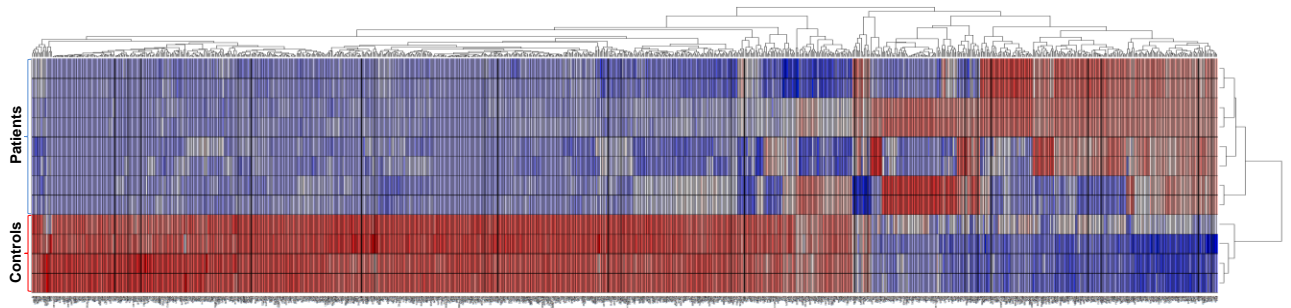

**Figure S9.** Unsupervised clustering of top 1000 most variant genes between breast patient samples and healthy controls. Each patient sample was analyzed as on-chip and release condition.

**Table S1.** Comparison of the Ct values of 5 genes across all samples.

|             | <u>EpCAM</u>        |      | <u>HER2</u>         |      | <u>EGFR</u>         |      | <u>CDH3</u>         |      | <u>MET</u>          |      |
|-------------|---------------------|------|---------------------|------|---------------------|------|---------------------|------|---------------------|------|
|             | Mean C <sub>t</sub> | S.D. |
| <b>PT1</b>  | 27.70               | 0.12 | 27.54               | 0.11 | ND                  |      | 29.32               | 0.02 | 35.78               | 0.31 |
| <b>PT1R</b> | 27.97               | 0.14 | 27.84               | 0.04 | ND                  |      | 29.62               | 0.09 | 36.20               | 0.18 |
| <b>PT2</b>  | 32.19               | 0.09 | 29.80               | 0.10 | 36.97               | 0.19 | 36.60               | 0.25 | ND                  | ND   |
| <b>PT2R</b> | 30.39               | 0.11 | 28.22               | 0.09 | 35.61               | 0.23 | 35.07               | 0.37 | ND                  | ND   |
| <b>PT3</b>  | 33.68               | 1.25 | 30.76               | 0.11 | 28.81               | 0.18 | 36.44               | 0.45 | 31.53               | 0.12 |
| <b>PT3R</b> | 35.01               | 0.12 | 31.19               | 0.10 | 29.49               | 0.01 | 37.78               | 0.64 | 32.31               | 0.09 |
| <b>PT4</b>  | 31.57               | 0.07 | 30.70               | 0.03 | 32.69               | 0.07 | 33.41               | 0.12 | 36.27               | 0.26 |
| <b>PT4R</b> | 29.42               | 0.19 | 28.64               | 0.10 | 30.96               | 0.03 | 31.22               | 0.15 | 33.64               | 0.08 |
| <b>H1</b>   | ND                  |      |
| <b>H2</b>   | ND                  |      |

**Table S2.** Set of 25 most variant genes between breast cancer patients and healthy controls

| <b>Gene</b> | <b>Description (Protein or RNA Level)</b>                                                                                                                                | <b>Ref. (#)</b> |
|-------------|--------------------------------------------------------------------------------------------------------------------------------------------------------------------------|-----------------|
| TFF1        | Frequently expressed in breast tumors. Function in breast cancer is unknown.                                                                                             | 1               |
| AGR2        | The human anterior gradient 2 (AGR2) is one of the targets of the estrogen receptor (ER), and it is an overexpressed gene in ER-positive breast cancer cell lines.       | 2               |
| S100A16     | Expression of this gene promotes epithelial to mesenchymal transition (EMT) via Notch1 pathway in breast cancer                                                          | 3               |
| KRT8        | Expression of cytokeratin KRT8 differentiates distinct subtypes of grade 3 invasive ductal carcinoma of the breast.                                                      | 4               |
| KRT18       | Expression of cytokeratin KRT18 differentiates distinct subtypes of grade 3 invasive ductal carcinoma of the breast.                                                     | 4               |
| MGP         | Matrix Gia protein repression by miR-155 promotes oncogenic signals in breast cancer cell lines.                                                                         | 5               |
| S100A14     | Co expression with S100A16 correlates with a poor prognosis in human breast cancer and promotes cancer invasion.                                                         | 6               |
| CLCA2       | Loss of this epithelial marker promotes EMT and indicates high risk of metastasis.                                                                                       | 7               |
| AZGP1       | Decreased expression of AZGP1 is associated with poor prognosis on primary gastric cancer.                                                                               | 8               |
| SCGB2A2     | Expression of secretoglobin family 2A member 2 (SCGB2A2) has been detected in a high percentage of primary and metastatic breast tumors.                                 | 9               |
| AGR3        | Gene associated with the level of differentiation of breast cancer cells, slowly proliferation tumors, and more favorable prognosis of breast cancer.                    | 10              |
| FXYD3       | Increased expression of the FXYD3 family of proteins has been associated with lung, colorectal cancer, and it also promotes cell proliferation in breast cancer as well. | 11              |
| TFF3        | TFF3 protein expression is associated with larger tumor size, lymph node metastasis, higher stage, and poor survival outcome.                                            | 12              |
| TM4SF1      | Transmembrane 4 superfamily member 1(TM4SF1) is a member of tetraspanins group of proteins, it shows reduced apoptosis.                                                  | 13              |
| SERPIN3     | Promotes endometrial cancer cell growth by regulating G2/M cell cycle checkpoint and apoptosis.                                                                          | 14              |
| IFI27       | At the protein level interferon alpha-inducible protein 27 (IFI27) promotes EMT transition and induces ovarian tumorigenicity and stemness.                              | 15              |
| CAV1        | One of the genes involved in breast cancer progression.                                                                                                                  | 16              |
| SERPINE1    | The serine protease inhibitor SERPINE1 is a poor prognosis biomarker in various cancers.                                                                                 | 17              |
| DKK1        | Preferentially expressed in hormone-resistant breast tumors and in some common cancer types.                                                                             | 18              |
| CD36        | Mayor glycoprotein on the surface of platelets, it is involved in a variety of adhesive processes.                                                                       | 19              |
| CD52        | Present in a variety of lymphocytes, it is function in anti-adhesion in T-cells                                                                                          | 20              |
| PECAM1      | Expressed in diverse cells of the vasculature, it has roles in angiogenesis, platelet function, thrombosis, and mechanosensing.                                          | 21              |
| CXCR2       | Key mediator in neutrophil migration.                                                                                                                                    | 22              |
| BIN2        | Involved in brain-neural function.                                                                                                                                       | 23              |
| TRAC        | Involve in the regulation of T-cell response.                                                                                                                            | 24              |

## References

- (1) Prest, S. J.; May, F. E.; Westley, B. R. *FASEB J.* **2002**, *16*, 592.
- (2) Salmans, M. L.; Zhao, F.; Andersen, B. *Breast Cancer Res.* **2013**, *15*, 204.
- (3) Zhou, W.; Pan, H.; Xia, T.; Xue, J.; Cheng, L.; Fan, P.; Zhang, Y.; Zhu, W.; Xue, Y.; Liu, X.; Ding, Q.; Liu, Y.; Wang, S. *J. Biomed. Sci.* **2014**, *21*, 97.
- (4) Walker, L. C.; Harris, G. C.; Holloway, A. J.; McKenzie, G. W.; Wells, J. E.; Robinson, B. A.; Morris, C. M. *Cancer Genet. Cytogenet.* **2007**, *178*, 94.
- (5) Tiago, D. M.; Conceição, N.; Caiado, H.; Laizé, V.; Cancela, M. L. *FEBS Lett.* **2016**, *590*, 1234.
- (6) Tanaka, M.; Ichikawa-Tomikawa, N.; Shishito, N.; Nishiura, K.; Miura, T.; Hozumi, A.; Chiba, H.; Yoshida, S.; Ohtake, T.; Sugino, T. *BMC Cancer* **2015**, *15*, 53.
- (7) Walia, V.; Yu, Y.; Cao, D.; Sun, M.; McLean, J. R.; Hollier, B. G.; Cheng, J.; Mani, S. A.; Rao, K.; Premkumar, L.; Elble, R. C. *Oncogene* **2012**, *31*, 2237.
- (8) Huang, C.-Y.; Zhao, J.-J.; Lv, L.; Chen, Y.-B.; Li, Y.-F.; Jiang, S.-S.; Wang, W.; Pan, K.; Zheng, Y.; Zhao, B.-W.; Wang, D.-D.; Chen, Y.-M.; Yang, L.; Zhou, Z.-W.; Xia, J.-C. *PLoS One* **2013**, *8*, e69155.
- (9) Shi, C.-X.; Long, M. A.; Liu, L.; Graham, F. L.; Gauldie, J.; Hitt, M. M. *Mol. Ther.* **2004**, *10*, 758.
- (10) J, O.; V, B.; J, P.; P, F.; P, D.; B, V.; R, H. *OncoTargets Ther.* **2015**, *8*, 1523.
- (11) Herrmann, P.; Aronica, S. M. *SpringerPlus* **2015**, *4*, 245.
- (12) Pandey, V.; Wu, Z.-S.; Zhang, M.; Li, R.; Zhang, J.; Zhu, T.; Lobie, P. E. *Breast Cancer Res.* **2014**, *16*, 429.
- (13) Huang, Y.-K.; Fan, X.-G.; Qiu, F. *Int. J. Mol. Sci.* **2016**, *17*, 661.
- (14) Yang, G.-D.; Yang, X.-M.; Lu, H.; Ren, Y.; Ma, M.-Z.; Zhu, L.-Y.; Wang, J.-H.; Song, W.-W.; Zhang, W.-M.; Zhang, R.; Zhang, Z.-G. *Int. J. Clin. Exp. Pathol.* **2014**, *7*, 1348.
- (15) Li, S.; Xie, Y.; Zhang, W.; Gao, J.; Wang, M.; Zheng, G.; Yin, X.; Xia, H.; Tao, X. *J. Surg. Res.* **2015**, *193*, 255.
- (16) Sloan, E. K.; Stanley, K. L.; Anderson, R. L. *Oncogene* **2004**, *23*, 7893.
- (17) Klein, R. M.; Bernstein, D.; Higgins, S. P.; Higgins, C. E.; Higgins, P. J. *Exp. Dermatol.* **2012**, *21*, 551.
- (18) Forget, M. A.; Turcotte, S.; Beauseigle, D.; Godin-Ethier, J.; Pelletier, S.; Martin, J.; Tanguay, S.; Lapointe, R. *Brit. J. Cancer* **2007**, *96*, 646.
- (19) Acton, S. L.; Scherer, P. E.; Lodish, H. F.; Krieger, M. *J. Biol. Chem.* **1994**, *269*, 21003.
- (20) Toh, B.-H.; Kyaw, T.; Tipping, P.; Bobik, A. *Cell. Mol. Immunol.* **2013**, *10*, 379.
- (21) Woodfin, A.; Voisin, M.-B.; Nourshargh, S. *Atterio. Thromb. Vasc. Biol.* **2007**, *27*, 2514.
- (22) Jamieson, T.; Clarke, M.; Steele, C. W.; Samuel, M. S.; Neumann, J.; Jung, A.; Huels, D.; Olson, M. F.; Das, S.; Nibbs, R. J. B.; Sansom, O. J. *J. Clin. Invest.* **2012**, *122*, 3127.
- (23) Corella, D.; Ordovás, J. M. *Ageing Res. Rev.* **2014**, *18*, 53.
- (24) Cenciarelli, C.; Hou, D.; Hsu, K.; Rellahan, B.; Wiest, D.; Smith, H.; Fried, V.; Weissman, A. *Science* **1992**, *257*, 795.
